# Supplementary material for: Synthesis of facetted Pt nanoparticles on SnO2 as an oxygen reduction catalyst
Source: Royal Society of Chemistry journal article supplement (doi:10.1039/c7ce00365j), 2017-01-01
Supplement: c7ce00365j1.pdf [file c7ce00365j1.pdf]

## Supporting Information: Synthesis of faceted Pt Nanoparticles on SnO<sub>2</sub> as Oxygen Reduction Catalyst

C. Gutsche\*<sup>a</sup>, M. Knipper<sup>a</sup>, T. Plaggenborg<sup>a</sup>, J. Parisi<sup>a</sup>, J. Kolny-Olesiak<sup>a</sup>

Received 00th January 20xx,  
Accepted 00th January 20xx

DOI: 10.1039/x0xx00000x

www.rsc.org/

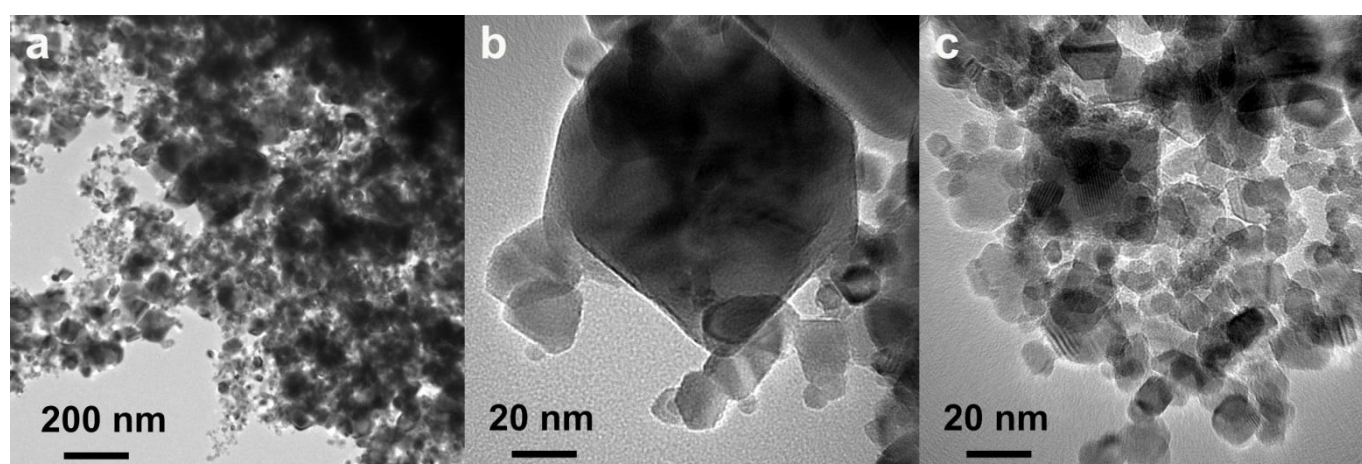

Fig. S1: TEM images of SnO<sub>2</sub> nanoparticles as bought showing a rather wide size distribution.

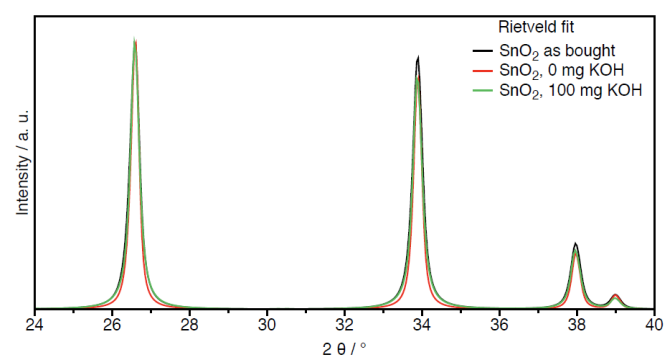

Fig. S2: Rietveld fits of the XRD patterns of the first SnO<sub>2</sub> peaks of the samples shown in Fig. 3 reveals the change in the peak width and, thus the mean crystallite diameter.

<sup>a</sup> University of Oldenburg, Department of Physics, Energy and Semiconductor Research Laboratory, Carl-von-Ossietzky Str. 9-11, 26129 Oldenburg, Germany. E-Mail: christian.gutsche@uni-oldenburg.de,

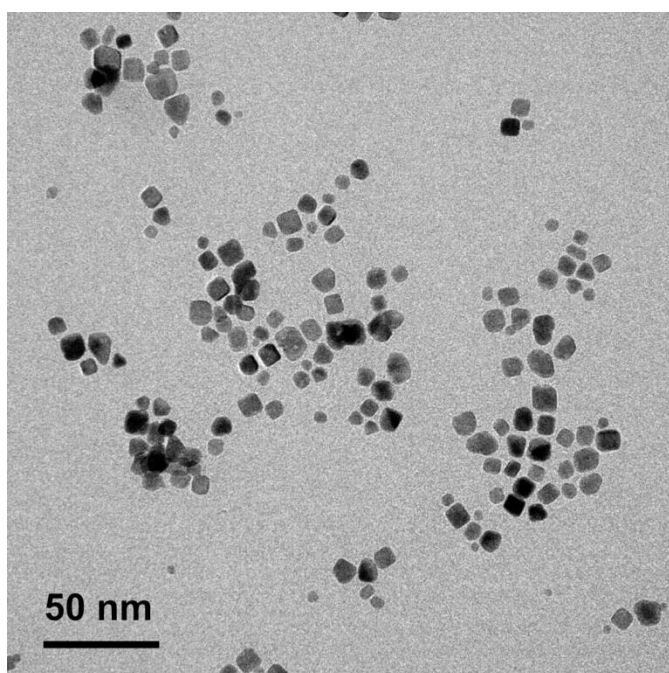

**Fig. S3:** TEM image of unsupported Pt nanocubes.

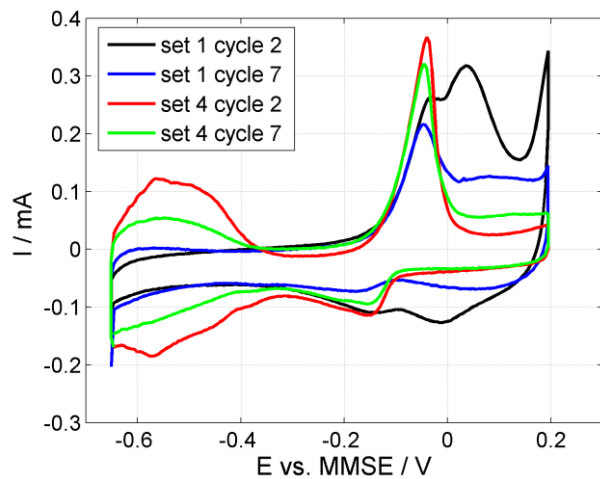

**Fig. S4:** Low potential range CVs of Ag200 with a scan rate of 0.1V/s in 0.5 M  $\text{H}_2\text{SO}_4$ . The development of the Ag features is analog to observations in the literature.<sup>20</sup> One set of low potential cycles consists of eight cycles. The four sets of low potential cycles are separated by three sets of each five wide potential cycles as described in the experimental section. At the beginning of the fourth set of low potential CVs, the hydrogen adsorption and desorption features are clearly visible but decline during the following cycles due to Ag redeposition.
